# Supplementary material
Source: PubMed Central journal article supplement (PMC3567338)
Supplement: supp_blood-2012-03-416503_blood-2012-03-416503-1.pdf [file supp_blood-2012-03-416503_blood-2012-03-416503-1.pdf]

## **Divergent effects of enhanced Notch signals on leukemia stem cells and hematopoietic stem cells**

Mark Y. Chiang, Olga Shestova, Lanwei Xu, Jon C. Aster, Warren S. Pear

**A**

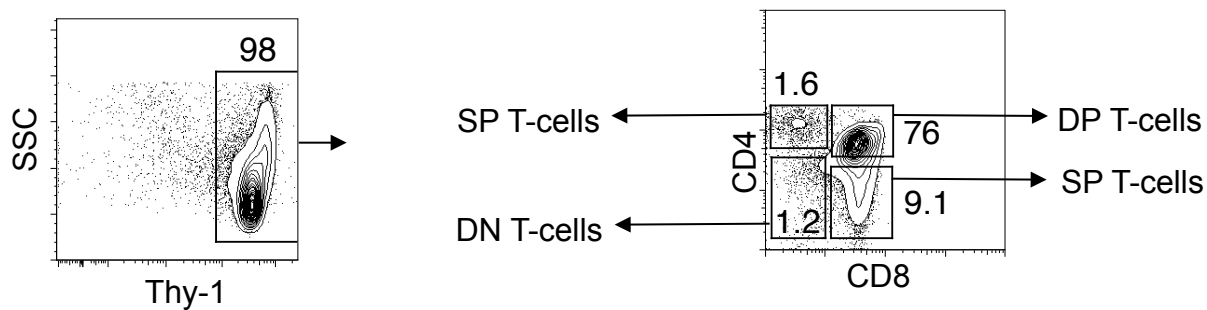

**B**

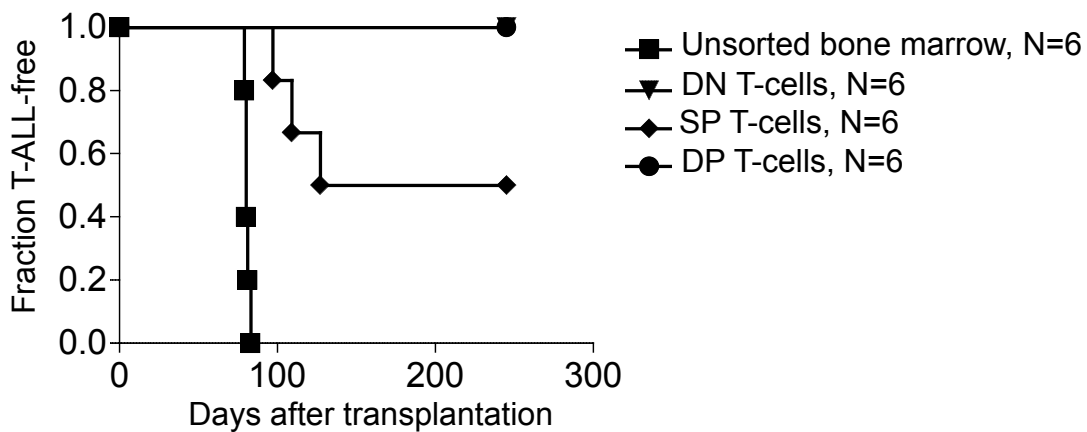

**C**

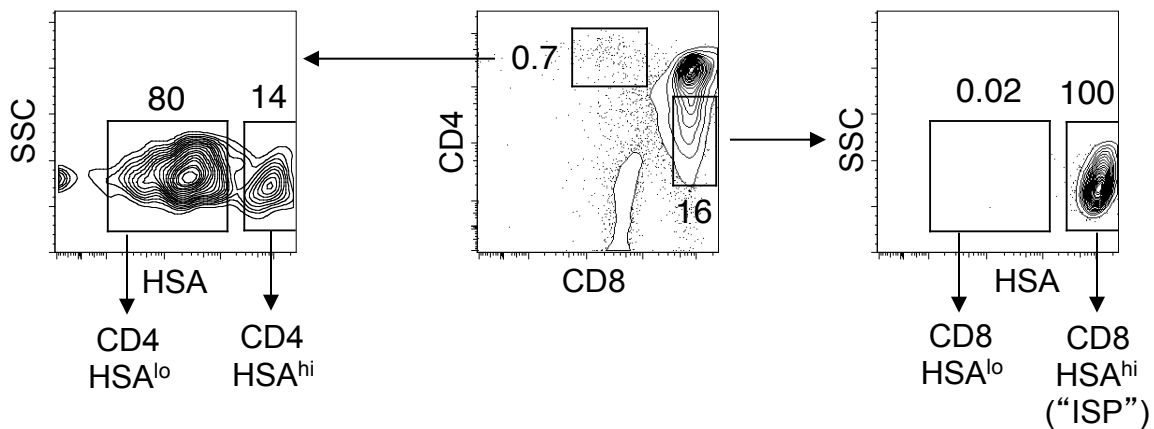

**D**

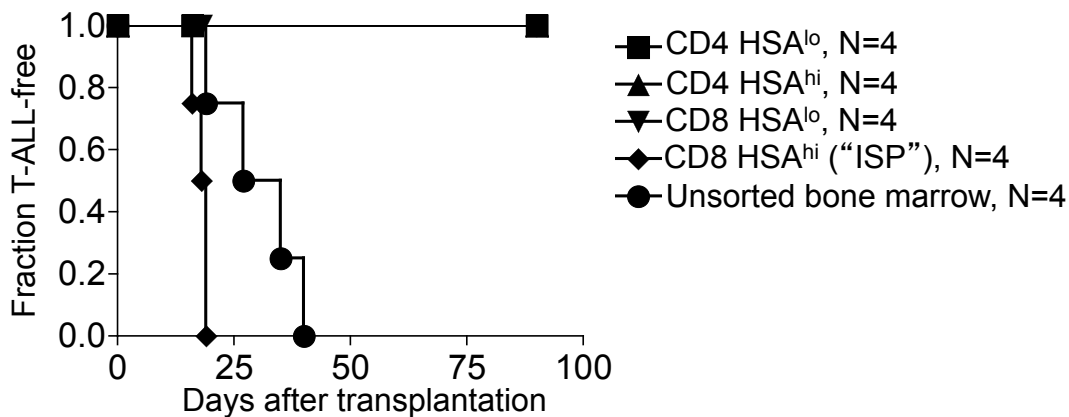

**Supplemental figure 1. LSC activity resides predominantly in the Immature Single Positive (ISP) compartment in Notch-induced T-ALL.** 12 lethally irradiated mice were reconstituted with 5FU-treated donor BM cells transduced with activated Notch1. After 6 weeks, bone marrow from leukemic mice was sorted into three GFP<sup>+</sup> subpopulations – DN T-cells (Thy-1<sup>+</sup>CD4<sup>-</sup>CD8<sup>-</sup>), SP T-cells (CD4<sup>+</sup>CD8<sup>-</sup> and CD4<sup>-</sup>CD8<sup>+</sup>), and DP T-cells (CD4<sup>+</sup>CD8<sup>+</sup>). (A) Unsorted cells along with all cells of each subpopulation were then equally transferred into 6 lethally irradiated mice along with 200,000 syngeneic normal BM cells. Absolute numbers of transferred cells per mouse: Unsorted cells (1,500,000 cells), DN T-cells (2500 cells), SP T-cells (30,000 cells), and DP T-cells (500,000 cells). Each mouse receiving DN T-cells received all the DN T-cells from 2 leukemic mice. Each mouse receiving SP T-cells received all the SP T-cells from 2 leukemic mice. Each recipient mouse receiving DP T-cells received all the DP T-cells from 2 leukemic mice. (B) Kaplan-Meier graphs show the fraction of secondary recipient mice without T-ALL as a function of time. (C) 16 lethally irradiated mice were reconstituted with 5FU-treated donor BM cells transduced with activated Notch1 ( $\Delta$ EGF $\Delta$ LNR $\Delta$ P). After 6 weeks, bone marrow from leukemic mice was sorted into four GFP<sup>+</sup> subpopulations -- CD4<sup>+</sup>HSA<sup>lo</sup>, CD4<sup>+</sup>HSA<sup>hi</sup>, CD8<sup>+</sup>HSA<sup>lo</sup>, and CD8<sup>+</sup>HSA<sup>hi</sup> (ISP-like). Unsorted cells and all the cells of each subpopulation were then equally transferred into 4 lethally irradiated mice along with 200,000 syngeneic normal BM cells. Absolute numbers of transferred cells per mouse: Unsorted (3,000,000 cells), CD4<sup>+</sup>HSA<sup>lo</sup> (30,000 cells), CD4<sup>+</sup>HSA<sup>hi</sup> (1,000 cells), CD8<sup>+</sup>HSA<sup>lo</sup> (300 cells), and CD8<sup>+</sup>HSA<sup>hi</sup> ISPs (600,000 cells). (D) Kaplan-Meier graphs show the fraction of secondary recipient mice without T-ALL as a function of time.

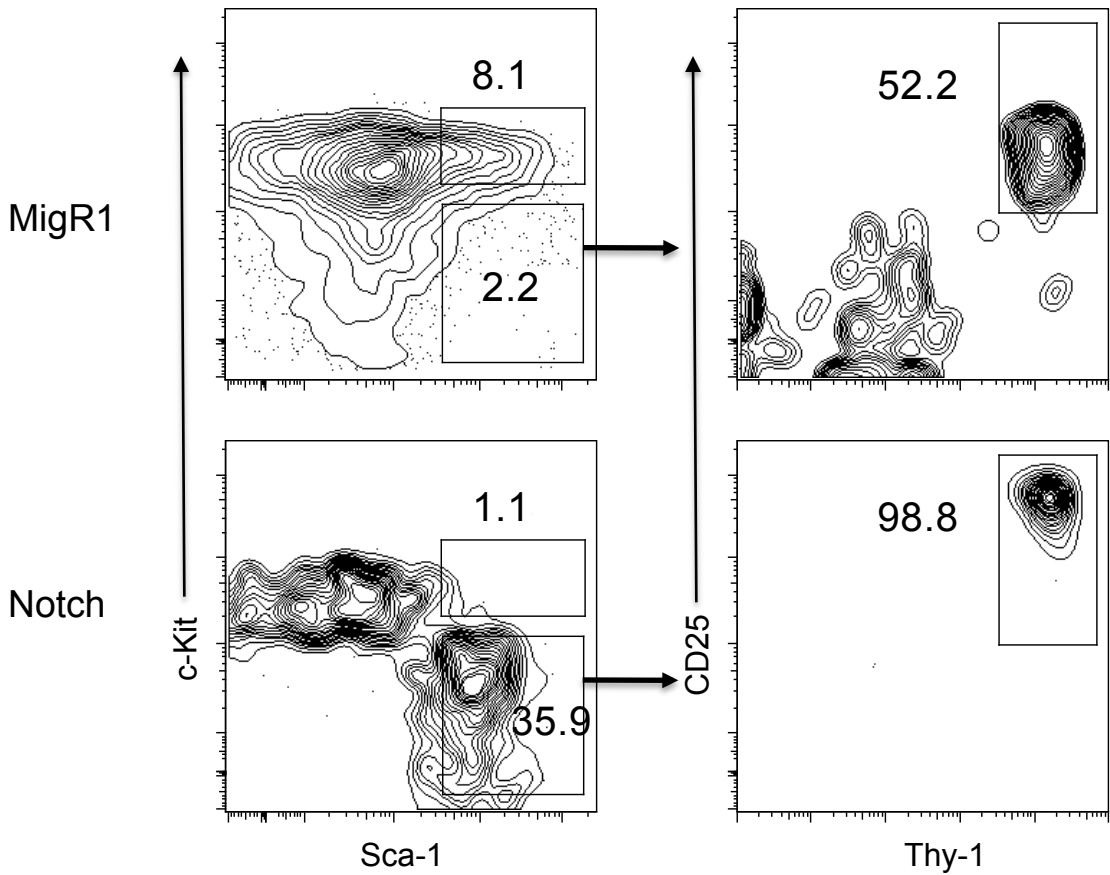

**Supplemental figure 2. Notch activation promotes the outgrowth of Sca-1<sup>+</sup>Lineage<sup>-</sup> T-cells.** MigR1 control and activated Notch were engineered into mice using bone marrow transplantation as described in Fig. 2. 13 weeks after transplantation, the Lineage-GFP<sup>+</sup> (donor-derived) compartment was analyzed for HSPCs (Lineage-Sca-1<sup>+</sup>c-Kit<sup>+</sup>) and DN T-cells (Sca-1<sup>+</sup>c-Kit<sup>-</sup>Thy-1<sup>+</sup>CD25<sup>+</sup>).

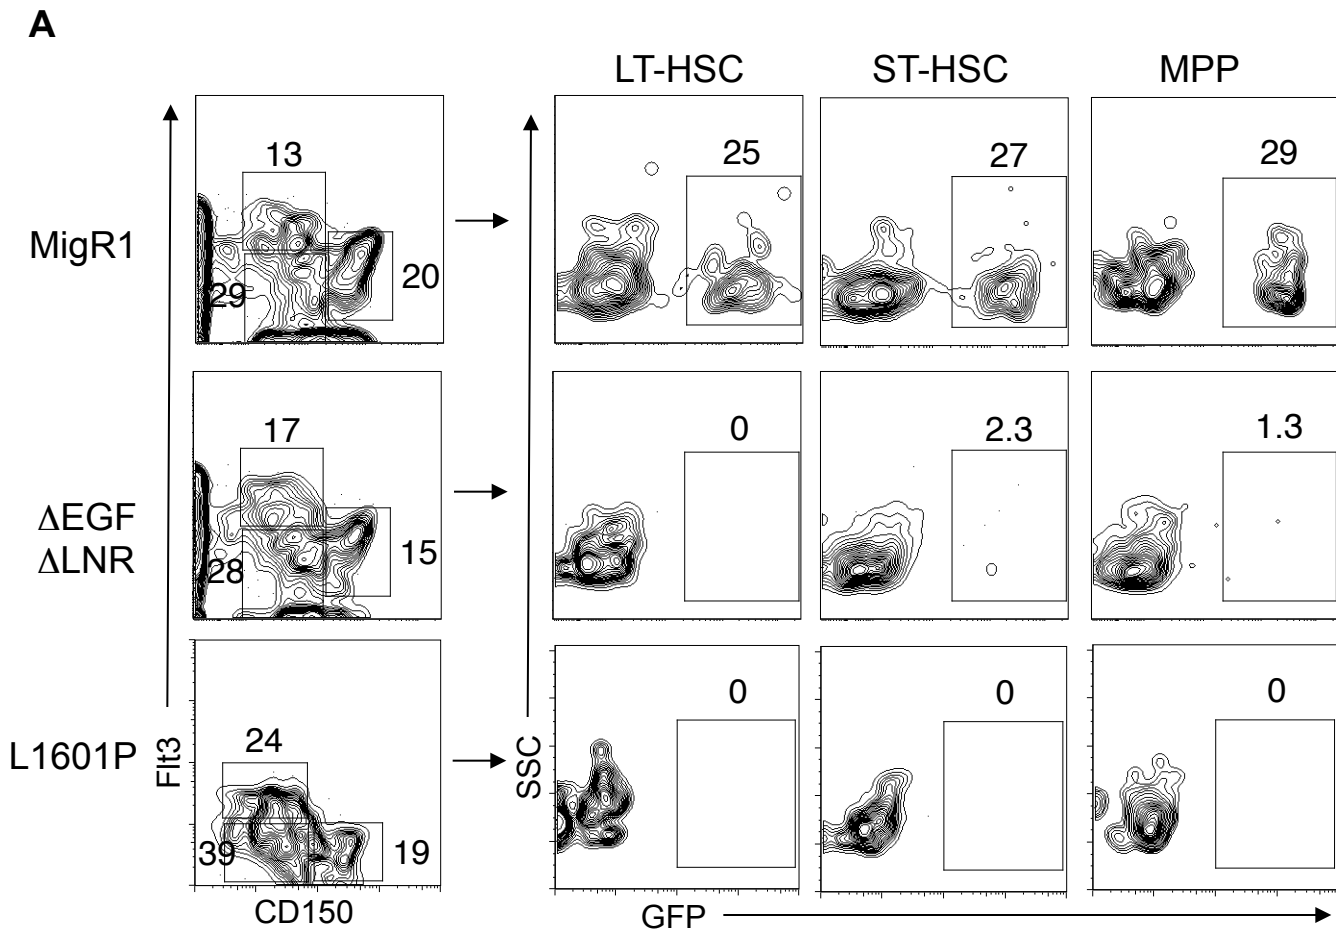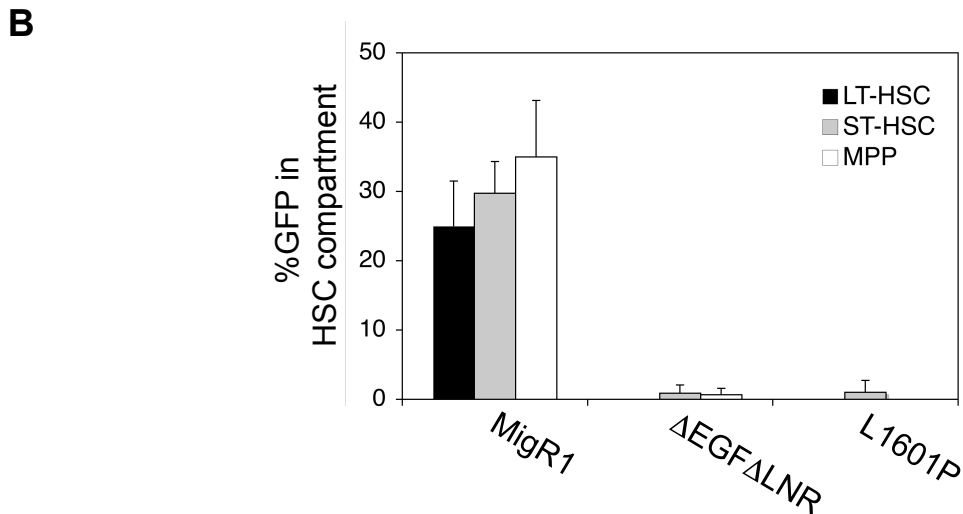

**Supplemental figure 3. Notch depletes HSC numbers in  $p16^{-/-}$  mice.** (A) Lethally irradiated mice were reconstituted with 5FU-treated donor  $p16^{-/-}$  BM cells transduced with MigR1 control or activated Notch1 alleles ( $\Delta$ EGF $\Delta$ LNR or L1601P). The long-term HSC (LT-HSC, Lineage-Sca-1<sup>+</sup>c-Kit<sup>+</sup>CD150<sup>+</sup>FIt3<sup>-</sup>), short-term HSC (ST-HSC, Lineage-Sca-1<sup>+</sup>c-Kit<sup>+</sup>CD150<sup>+</sup>FIt3<sup>-</sup>), and Multipotent Progenitor (MPP, Lineage-Sca-1<sup>+</sup>c-Kit<sup>+</sup>CD150<sup>+</sup>FIt3<sup>-</sup>) compartments were measured for donor (GFP<sup>+</sup>) reconstitution by MigR1 control and Notch-activated HSCs at 13 weeks post-transplantation. (B) Bar graph analysis of donor-derived (GFP<sup>+</sup>) LT-HSCs, ST-HSCs, and MPPs in MigR1 control and activated Notch mice at 13 weeks after transplantation.

**A**

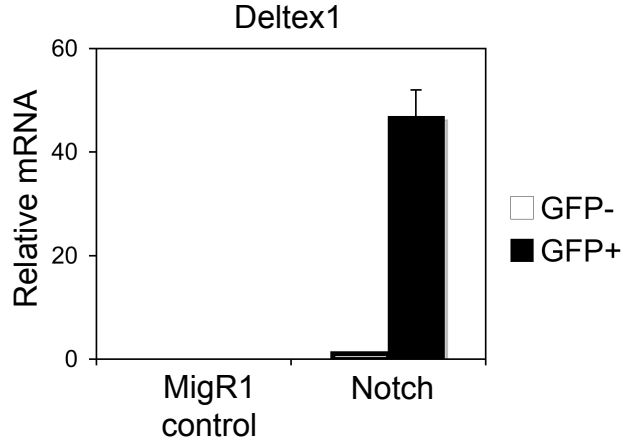

**B**

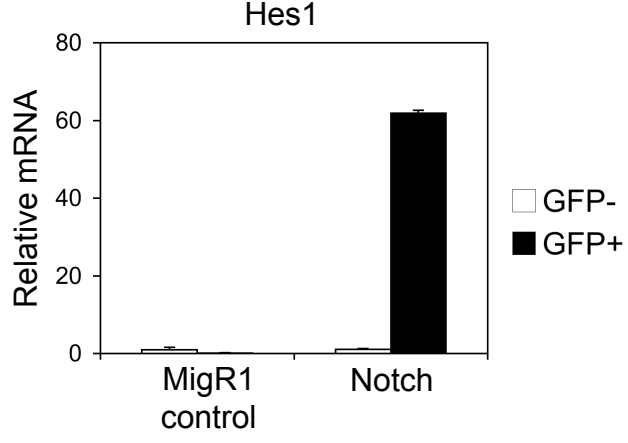

**C**

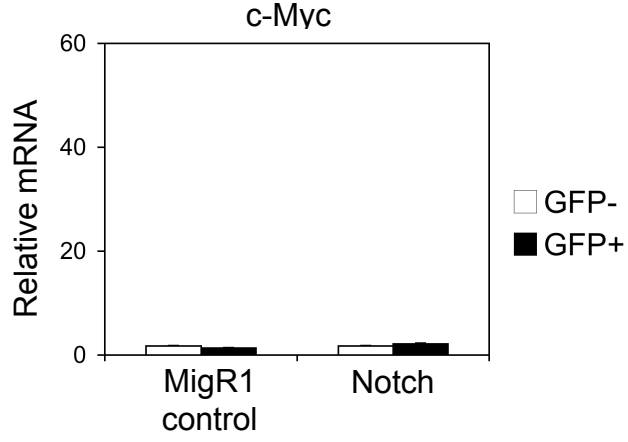

**Supplemental figure 4. Notch signaling in HSPCs induces Notch targets Deltex1 and Hes1 but not c-Myc.** Lethally irradiated mice were reconstituted with 5FU-treated donor Rag1<sup>-/-</sup> BM cells transduced with MigR1 control or activated Notch1. At six weeks after transplant, the donor-derived HSPC compartment (GFP<sup>+</sup>Lineage-Sca-1<sup>+</sup>c-Kit<sup>+</sup>) was sorted and analyzed for indicated Notch target gene expression by quantitative real-time PCR. Gene expression levels were quantified relative to a standard generated using cDNA from the murine T-ALL leukemia cell line, SCID-ADH, and normalized to 18S expression.

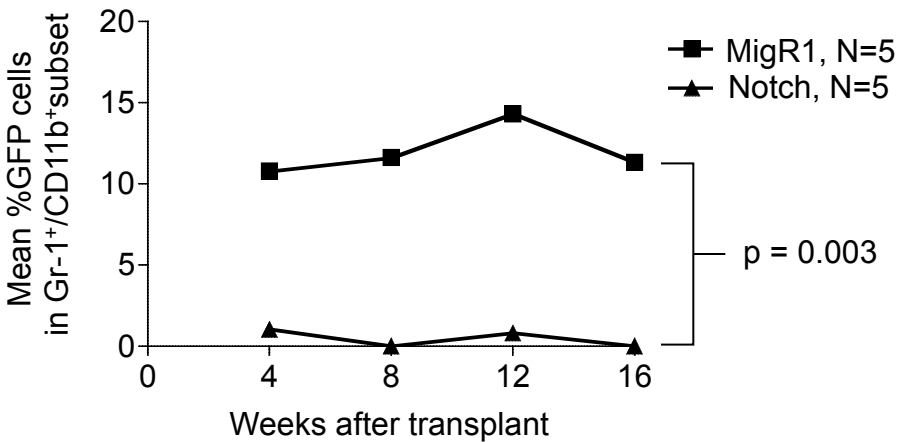

**Supplemental figure 5. Competitive transplantation of Notch-activated HSPCs leads to impaired myeloid reconstitution.** As described in Fig. 5, 500 Rag1<sup>-/-</sup> HSPCs (GFP<sup>+</sup>CD45.2<sup>+</sup>Lineage-Sca-1<sup>+</sup>c-Kit<sup>+</sup>) retrovirally transduced with MigR1 control or Notch were transferred to lethally irradiated mice with 200,000 CD45.1<sup>+</sup> whole BM competitors. Mice were bled every 4 weeks to measure donor (GFP<sup>+</sup>) reconstitution of the myeloid compartment (CD11b<sup>+</sup>Gr-1<sup>+</sup>). Experiment was performed three times.

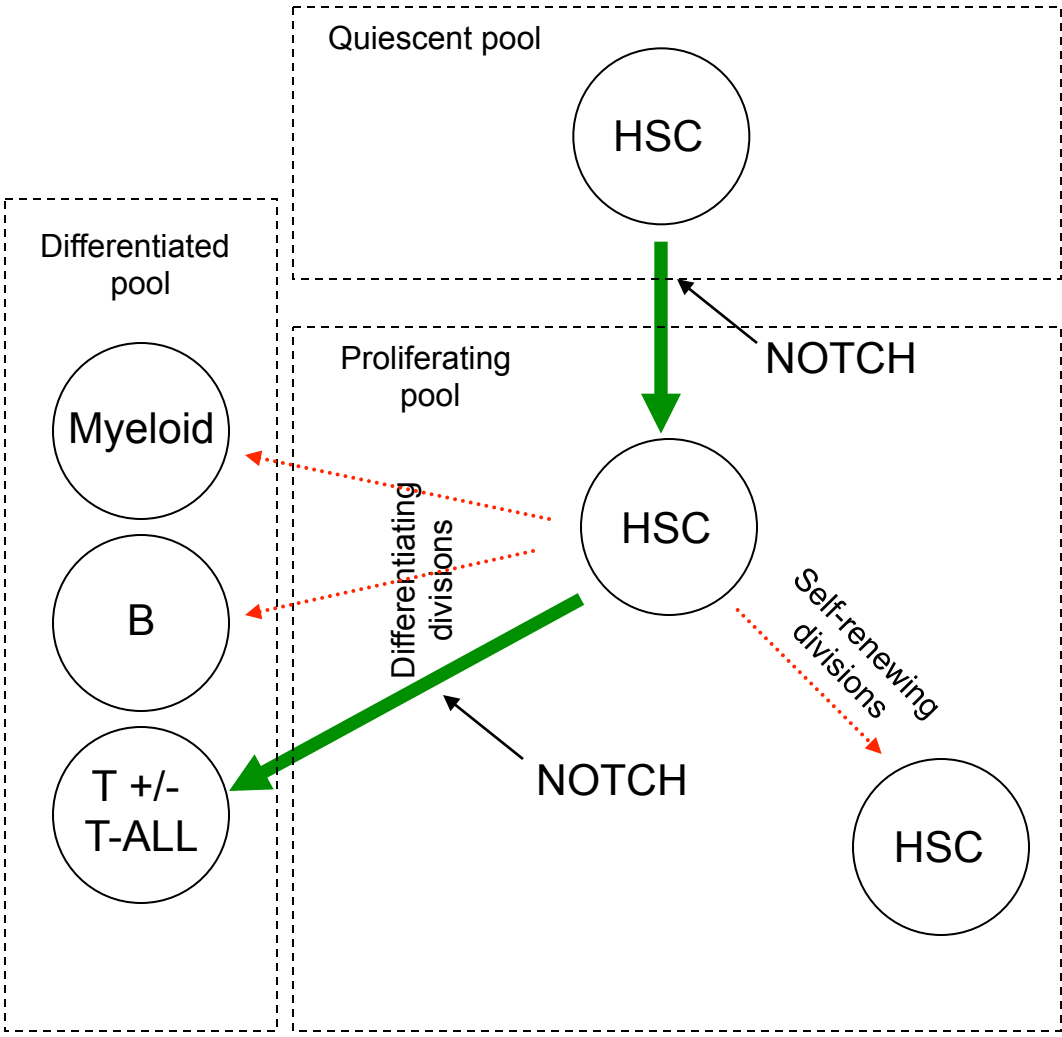

**Supplemental figure 6. Model of how Notch may progressively deplete the HSC compartment over time.** Notch signaling drives quiescent HSCs into cell cycle and directs them into differentiating divisions toward the T-cell lineage at the expense of self-renewing divisions that would preserve HSC numbers.



# Supplemental Table 1

| Supplemental Table 1. Summary of transfer experiments of various T-cell subsets from Notch-induced leukemia into lethally irradiated syngeneic recipients. |                       |                                        |               |                     |
|------------------------------------------------------------------------------------------------------------------------------------------------------------|-----------------------|----------------------------------------|---------------|---------------------|
| T-cell subset transferred                                                                                                                                  | Cell dose (per mouse) | Outcome (Fraction T-ALL <sup>A</sup> ) | LSC frequency | 95% C.I.            |
| Double-negative DN T-cells <sup>B</sup>                                                                                                                    | 2,500                 | 0/6                                    |               |                     |
|                                                                                                                                                            | 500                   | 0/2                                    |               |                     |
| CD4 HSA <sup>lo</sup> T-cells                                                                                                                              | 150,000               | 0/6                                    |               |                     |
|                                                                                                                                                            | 5,000                 | 0/6                                    |               |                     |
| CD4 HSA <sup>hi</sup> T-cells                                                                                                                              | 6,000                 | 0/6                                    |               |                     |
|                                                                                                                                                            | 1,000                 | 0/6                                    |               |                     |
| CD8 HSA <sup>lo</sup> T-cells                                                                                                                              | 500                   | 0/4                                    |               |                     |
|                                                                                                                                                            | 150                   | 0/6                                    |               |                     |
| CD8 HSA <sup>hi</sup> T-cells (ISP)                                                                                                                        | 300,000               | 7/7                                    | 1:953         | 1:443 - 1:2051      |
|                                                                                                                                                            | 30,000                | 4/4                                    |               |                     |
|                                                                                                                                                            | 3,000                 | 8/8                                    |               |                     |
|                                                                                                                                                            | 300                   | 2/10                                   |               |                     |
|                                                                                                                                                            | 30                    | 0/10                                   |               |                     |
| Double-positive DP T-cells                                                                                                                                 | 3,000,000             | 6/6                                    | 1:229482      | 1:126400 - 1:416629 |
|                                                                                                                                                            | 300,000               | 11/13                                  |               |                     |
| 30,000                                                                                                                                                     | 0/19                  |                                        |               |                     |
| 3,000                                                                                                                                                      | 0/18                  |                                        |               |                     |

<sup>A</sup>T-ALL defined by flow cytometrically-defined T-cell lymphoblasts >20% of BM cells and/or diffuse lymphadenopathy and splenomegaly.  
<sup>B</sup>Thy-1<sup>+</sup>CD4<sup>+</sup>CD8<sup>-</sup> BM cells
